# Supplementary material for: Stable Cretaceous sex chromosomes enable molecular sexing in softshell turtles (Testudines: Trionychidae)
Source: PubMed Central journal article supplement (PMC5301483; doi:10.1038/srep42150), 2017-02-10
Supplement: srep42150-s1.pdf [file srep42150-s1.pdf]

Supplementary information to "Stable Cretaceous sex chromosomes enable molecular sexing in softshell turtles (Testudines: Trionychidae)"

MICHAIL ROVATSOS, PETER PRASCHAG, UWE FRITZ and LUKÁŠ KRATOCHVÍL

**Table S1:** Trionychid specimens used in the study. Samples with museum voucher number were provided from Senckenberg Natural History Collections of Dresden.

| Taxon                              | Sex | Museum voucher number | Origin                                     | Source      |
|------------------------------------|-----|-----------------------|--------------------------------------------|-------------|
| <i>Amyda cartilaginea</i>          | ♂   | MTD T 7075            | -                                          | pet trade   |
| <i>Amyda cartilaginea</i>          | ♀   | MTD T 7074            | -                                          | pet trade   |
| <i>Apalone spinifera</i>           | ♂   | -                     | -                                          | pet trade   |
| <i>Apalone spinifera</i>           | ♀   | -                     | -                                          | pet trade   |
| <i>Chitra indica</i>               | ♂   | -                     | Jamuna River, Bangladesh                   | captive     |
| <i>Chitra indica</i>               | ♀   | -                     | Jamuna River, Bangladesh                   | captive     |
| <i>Lissemys ceylonensis</i>        | ♂   | MTD T 6052            | 50 km S Colombo, Sri Lanka                 | wild-caught |
| <i>Lissemys ceylonensis</i>        | ♀   | MTD T 6053            | 50 km S Colombo, Sri Lanka                 | wild-caught |
| <i>Lissemys punctata andersoni</i> | ♂   | MTD T 3424            | Khulna, Bangladesh                         | wild-caught |
| <i>Lissemys punctata andersoni</i> | ♀   | MTD T 3423            | Khulna, Bangladesh                         | wild-caught |
| <i>Lissemys punctata punctata</i>  | ♂   | MTD T 6058            | Mahabalipuram, Tamila Nadu, India          | wild-caught |
| <i>Lissemys punctata punctata</i>  | ♀   | MTD T 6047            | Kotamangalam, Moyyar River, Kerala, India  | wild-caught |
| <i>Lissemys punctata vittata</i>   | ♂   | MTD T 6048            | Mangalore, Karnataka, India                | wild-caught |
| <i>Lissemys punctata vittata</i>   | ♀   | MTD T 5369            | Goa, India                                 | captive     |
| <i>Lissemys scutata</i>            | ♂   | MTD T 4064            | Myanmar                                    | captive     |
| <i>Lissemys scutata</i>            | ♀   | MTD T 4063            | Myanmar                                    | captive     |
| <i>Nilssonia gangetica</i>         | ♂   | MTD T 5263            | Mahanadi River, Narsinghpur, Odisha, India | wild-caught |
| <i>Nilssonia gangetica</i>         | ♀   | MTD T 5252            | Mahanadi River, Narsinghpur, Odisha, India | wild-caught |
| <i>Nilssonia hurum</i>             | ♂   | -                     | -                                          | pet trade   |
| <i>Nilssonia hurum</i>             | ♀   | -                     | Feni, Bangladesh                           | captive     |
| <i>Nilssonia nigricans</i>         | ♂   | -                     | Meghna River, Bangladesh                   | captive     |
| <i>Nilssonia nigricans</i>         | ♀   | -                     | Kamakhya, Assam, India                     | captive     |
| <i>Pelodiscus sinensis</i>         | ♂   | MTD T 14913           | Jiangxi, China                             | wild-caught |
| <i>Pelodiscus sinensis</i>         | ♀   | MTD T 14912           | Jiangxi, China                             | wild-caught |

**Table S2.** Primers used for the measurement of relative gene dosage by qPCR.

| <b>gene name</b>                                                     | <b>gene symbol</b> | <b>position in <i>Pelodiscus sinensis</i> genome</b> | <b>primer name</b> |
|----------------------------------------------------------------------|--------------------|------------------------------------------------------|--------------------|
| recombination activating 1                                           | rag1               | NW_005855489.1                                       | rag1_pesi_2        |
| 18S major ribosomal RNA subunit                                      | 18S rRNA           | -                                                    | 18S_rRNA           |
| adenosine deaminase, RNA specific B2                                 | adarb2             | NW_005851920.1                                       | adarb2_pesi_3      |
| MDS1 and EVI1 complex locus                                          | mecom              | NW_005857417.1                                       | mecom_pesi_3       |
| cut like homeobox 2                                                  | cux2               | NW_005857745.1                                       | cux2_pesi_1        |
| SH2B adapter protein 3                                               | sh2b3              | NW_005852765.1                                       | sh2b3_pesi_2       |
| transmembrane protein 132D                                           | tmem132d           | NW_005854402.1                                       | tmem132d_pesi_1    |
| protein phosphatase, Mg <sup>2+</sup> /Mn <sup>2+</sup> dependent 1F | ppm1f              | NW_005858854.1                                       | ppm1f_pesi_1       |
| coiled-coil domain containing 92                                     | ccdc92             | NW_005854194.1                                       | ccdc92_pesi_2      |
| anaphase promoting complex subunit 7                                 | anapc7             | NW_005858868.1                                       | anapc7_18          |

| <b>forward primer</b>     | <b>reverse primer</b>    | <b>amplicon size</b> |
|---------------------------|--------------------------|----------------------|
| CAAAATGCTATGAAATGGAGGATGT | TCTTCTAAACTCTGCCCTGGA    | 136                  |
| GAGTATGGTTGCAAAGCTGAAA    | CGAGAAAGAGCTATCAATCTGT   | 144                  |
| AAACGGCGAGAGGATTGGGA      | TTCATAGGGAGAGTTGAGGCGTG  | 138                  |
| AACAAACAAAAGTCAAAGTCCCC   | ACATCATCAAGGTCACTACTCTCT | 195                  |
| AGGTCTCTCTGAACTCGCCC      | GTGCCTTCGCTGGATGTTTGA    | 200                  |
| GACTATCGGGAGACCAGCA       | CAGATGGGTGAGAGAGAAGTGT   | 182                  |
| CGCTGAACCCTCCGACTCA       | CCCAATCAAAACCTGTCCACCT   | 145                  |
| AGATGGTTTCAAGGCAGCAGAG    | CTGAGGTTTTTtagGGTCTCCCAG | 141                  |
| ACGCACTTCAGGAGAATCACAAA   | ATGCTTTCGGACCACTTTACTTC  | 163                  |
| TAGGTTTGTGTCGCTCTCAGT     | GGCTCTTGTGTTATCTCCTGTGT  | 143                  |

**Table S3.** Relative gene dose ratios (r) between female and male genomes.

The symbol "x" means that the primer was tested, but the amplification was not successful (e.g. due to secondary product).

| primer pair                              | assumed position in trionychid genomes | <i>Lissemys scutata</i> | <i>Lissemys ceylonensis</i> | <i>Lissemys punctata punctata</i> |
|------------------------------------------|----------------------------------------|-------------------------|-----------------------------|-----------------------------------|
| <b>18S_rRNA</b>                          | Z and W chromosomes                    | 2.80                    | 5.15                        | 0.94                              |
| adarb2_pesi_3                            | (pseudo)autosomal                      | 1.03                    | 1.20                        | 1.02                              |
| mecom_pesi_3                             | (pseudo)autosomal                      | 0.98                    | 1.18                        |                                   |
| <b>Average (pseudo)autosomal values:</b> |                                        | 1.01                    | 1.19                        | 1.02                              |
| cux2_pesi_1                              | Z-specific                             | 0.58                    | 0.51                        | 0.39                              |
| sh2b3_pesi_2                             | Z-specific                             | 0.50                    | 0.54                        | 0.36                              |
| tmem132d_pesi_1                          | Z-specific                             | x                       | x                           | x                                 |
| ppm1f_pesi_1                             | Z-specific                             | 0.55                    | 0.48                        | 0.60                              |
| ccdc92_pesi_2                            | Z-specific                             | 0.60                    | 0.63                        | 0.43                              |
| anapc7_18                                | Z-specific                             | x                       | x                           | x                                 |
| <b>Average Z-specific values:</b>        |                                        | 0.56                    | 0.54                        | 0.45                              |

| <i>Lissemys punctata andersoni</i> | <i>Lissemys punctata vittata</i> | <i>Chitra indica</i> | <i>Apalone spinifera</i> | <i>Pelodiscus sinensis</i> | <i>Amyda cartilaginea</i> |
|------------------------------------|----------------------------------|----------------------|--------------------------|----------------------------|---------------------------|
| 0.69                               | 4.55                             | 3.68                 | 3.43                     | 4.40                       | 11.00                     |
| 1.10                               | 1.04                             | 1.10                 | 1.02                     | 1.16                       | 0.86                      |
| 1.07                               |                                  | 0.76                 | 0.90                     | 1.08                       | 0.72                      |
| 1.09                               | 1.04                             | 0.93                 | 0.96                     | 1.12                       | 0.79                      |
| 0.43                               | 0.41                             | 0.54                 | x                        | 0.92                       | 0.40                      |
| 0.52                               | 0.50                             | 0.51                 | x                        | 0.66                       | 0.38                      |
| x                                  | x                                | 0.43                 | 0.51                     | 0.45                       | 0.39                      |
| 0.48                               | 0.47                             | 0.37                 | x                        | 0.56                       | 0.35                      |
| 0.46                               | 0.49                             | 0.36                 | 0.43                     | 0.54                       | 0.40                      |
| x                                  | x                                | 0.39                 | 0.42                     | 0.51                       | x                         |
| 0.47                               | 0.47                             | 0.43                 | 0.45                     | 0.61                       | 0.38                      |

| <i>Nilssonia gangetica</i> | <i>Nilssonia nigricans</i> | <i>Nilssonia hurum</i> |
|----------------------------|----------------------------|------------------------|
| 3.60                       | 18.40                      | 3.20                   |
| 1.08                       | 1.40                       | 0.92                   |
| 0.78                       | 1.29                       | 0.96                   |
| 0.93                       | 1.35                       | 0.94                   |
| 0.39                       | 0.63                       | x                      |
| 0.37                       | 0.54                       | 0.42                   |
| 0.46                       | 0.51                       | 0.38                   |
| 0.49                       | 0.62                       | 0.41                   |
| 0.48                       | 0.74                       | 0.38                   |
| 0.47                       | 0.61                       | 0.35                   |
| 0.44                       | 0.61                       | 0.39                   |
